# Supplementary material for: A Novel Pathogenic Variant in MT-CO2 Causes an Isolated Mitochondrial Complex IV Deficiency and Late-Onset Cerebellar Ataxia
Source: PubMed Central journal article supplement (PMC6617079; doi:10.3390/jcm8060789), 2019-06-04
Supplement: jcm-08-00789-s001.pdf [file jcm-08-00789-s001.pdf]

**Supplementary Table 1.** Summary of previously reported cases with pathogenic variants in the MT-CO2 gene.

| Publication                  | Age of onset                   | Clinical features                                                                                             | Variant      | Heteroplasmy                                                        | Maternal inheritance                                                            |
|------------------------------|--------------------------------|---------------------------------------------------------------------------------------------------------------|--------------|---------------------------------------------------------------------|---------------------------------------------------------------------------------|
| Rahman et al. 1999           | 14 years                       | Myopathy, lactic acidosis                                                                                     | m.7671T>A    | Muscle (90%), blood (5%)                                            | Possible de novo<br>(not detectable in mother's blood)                          |
| Clark et al. 1999<br>Proband | 5 years                        | Progressive gait ataxia, cognitive impairment, OA, RP                                                         | m.7587T>C    | Muscle (91%)                                                        | Yes                                                                             |
| Mother                       | 47 years                       | Cerebellar ataxia                                                                                             | m.7587T>C    | Muscle (67%)                                                        | Yes                                                                             |
| Wong et al. 2001             | At birth<br>(born prematurely) | Apnoea, bradycardia and severe lactic acidosis.<br>The other twin brother died similarly.                     | m. 8042delAT | Muscle (20%), cardiac (17%), lung (14%), liver (14%), skin (12%)    | Possible maternal based on family pedigree but not detectable in mother's blood |
| Campos et al. 2001           | 3 months                       | Psychomotor delay, failure to thrive, RP, LVH, lactic acidosis                                                | m.7896G>A    | Muscle (76%), blood (67%), fibroblast (60%)                         | Possible de novo<br>(not detectable in blood of mother and sister)              |
| Uusimaa et al. 2002          | 6 months                       | Failure to thrive, Alper-like disease, cardiomyopathy, lactic acidosis                                        | m.7706G>A    | Muscle (90%), blood (87%), kidney (90%), liver (91%), brain (91%)   | Yes; blood in asymptomatic mother (72%) and grandmother (66%)                   |
| McFarland et al. 2004        | 30 years                       | Recurrent rhabdomyolysis                                                                                      | m.7989T>C    | Muscle, not detectable in blood                                     | Possible de novo<br>(not detectable in mother's blood)                          |
| Horvath et al. 2005          | 15 years                       | Short stature, myopathy, cataract, SNHL, cardiac arrhythmia, lactic acidosis, ataxia and acute encephalopathy | m.7970G>T    | Muscle (90%)                                                        | Yes; detectable in blood and urine samples of sister and niece (10-15%)         |
| Rossmannith et al. 2005      | 13 years                       | MELAS, LVH, myoclonus, basal ganglia calcification                                                            | m.7630delT   | Muscle (93%), blood (28%)                                           | Possible de novo<br>(not detectable in blood of mother and other siblings)      |
| Zhadanov et al. 2006         | 24 years                       | LHON, epilepsy                                                                                                | m.7598G>A    | Blood (80%)                                                         | Yes; blood in asymptomatic mother (25%)                                         |
| Vissing et al. 2013          | Childhood                      | Recurrent myoglobinuria, abnormal acylcarnitidine profile (MADD)                                              | m.8156dupG   | Muscle (56%); not detectable in blood, urine, buccal and fibroblast | Possible de novo                                                                |

|                       |          |                                                                                                                  |            |                                                                                 |                                                                              |
|-----------------------|----------|------------------------------------------------------------------------------------------------------------------|------------|---------------------------------------------------------------------------------|------------------------------------------------------------------------------|
| Kytovuori et al. 2017 |          | Deafness, progressive cognitive decline, epilepsy, psychosis, exercise intolerance, RP, cataract (in early 20s), | m.8156delG | Muscle (95%), buccal (33%), blood (26%)                                         | Possible de novo (not detectable in blood of mother and other siblings)      |
| Roos et al. 2019      | 14 years | Myopathy, exercise intolerance and abnormal acylcarnitidine profile (MADD)                                       | m.8088delT | Muscle (96%), hair (2%), blood (5%), fibroblast (6%), urine (15%), buccal (12%) | Possible de novo (not detectable in multiple non-invasive tissues of mother) |

LHON= Leber hereditary optic neuropathy, LVH= left ventricular hypertrophy, MADD= multiple acyl-CoA-dehydrogenase deficiency, OA= optic atrophy, RP= retinitis pigmentosa, SNHL= sensorineural hearing loss, MELAS= mitochondrial encephalomyopathy, lactic acidosis and stroke like episode.

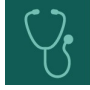

## References

1. Rahman S, Taanman JW, Cooper JM, et al. A missense mutation of cytochrome oxidase subunit II causes defective assembly and myopathy. *American journal of human genetics*. 1999 Oct;65(4):1030-9.
2. Clark KM, Taylor RW, Johnson MA, et al. An mtDNA mutation in the initiation codon of the cytochrome C oxidase subunit II gene results in lower levels of the protein and a mitochondrial encephalomyopathy. *American journal of human genetics*. 1999 May;64(5):1330-9.
3. Wong LJ, Dai P, Tan D, et al. Severe lactic acidosis caused by a novel frame-shift mutation in mitochondrial-encoded cytochrome c oxidase subunit II. *American journal of medical genetics*. 2001 Jul 22;102(1):95-9.
4. Campos Y, Garcia-Redondo A, Fernandez-Moreno MA, et al. Early-onset multisystem mitochondrial disorder caused by a nonsense mutation in the mitochondrial DNA cytochrome C oxidase II gene. *Annals of neurology*. 2001 Sep;50(3):409-13.
5. Uusimaa J, Finnila S, Vainionpaa L, et al. A mutation in mitochondrial DNA-encoded cytochrome c oxidase II gene in a child with Alpers-Huttenlocher-like disease. *Pediatrics*. 2003;111(3):e262-8.
6. McFarland R, Taylor RW, Chinnery PF, Howell N, Turnbull DM. A novel sporadic mutation in cytochrome c oxidase subunit II as a cause of rhabdomyolysis. *Neuromuscular disorders: NMD*. 2004 Feb;14(2):162-6.
7. Horvath R, Schoser BG, Muller-Hocker J, Volpel M, Jaksch M, Lochmuller H. Mutations in mtDNA-encoded cytochrome c oxidase subunit genes causing isolated myopathy or severe encephalomyopathy. *Neuromuscular disorders: NMD*. 2005 Dec;15(12):851-7.
8. Rossmannith W, Freilinger M, Roka J, et al. Isolated cytochrome c oxidase deficiency as a cause of MELAS. *BMJ case reports*. 2009;2009.
9. Zhadanov SI, Atamanov VV, Zhadanov NI, Schurr TG. De novo COX2 mutation in a LHON family of Caucasian origin: implication for the role of mtDNA polymorphism in human pathology. *Journal of human genetics*. 2006;51(3):161-70.
10. Vissing CR, Duno M, Olesen JH, et al. Recurrent myoglobinuria and deranged acylcarnitines due to a mutation in the mtDNA MT-CO2 gene. *Neurology*. 2013 May 14;80(20):1908-10.
11. Kytovuori L, Karppa M, Tuominen H, et al. Case report: a novel frameshift mutation in the mitochondrial cytochrome c oxidase II gene causing mitochondrial disorder. *BMC neurology*. 2017 May 18;17(1):96.
12. Roos S, Sofou K, Hedberg-Oldfors C, et al. Mitochondrial complex IV deficiency caused by a novel frameshift variant in MT-CO2 associated with myopathy and perturbed acylcarnitine profile. *European journal of human genetics: EJHG*. 2019 Feb;27(2):331-5.
